# Supplementary material for: SP110 Polymorphisms Are Genetic Markers for Vulnerability to Latent and Active Tuberculosis Infection in Taiwan
Source: PubMed Central journal article supplement (PMC6304864; doi:10.1155/2018/4687380), 2018-12-05
Supplement: 4687380.f1.pdf [file 4687380.f1.pdf]

**a**

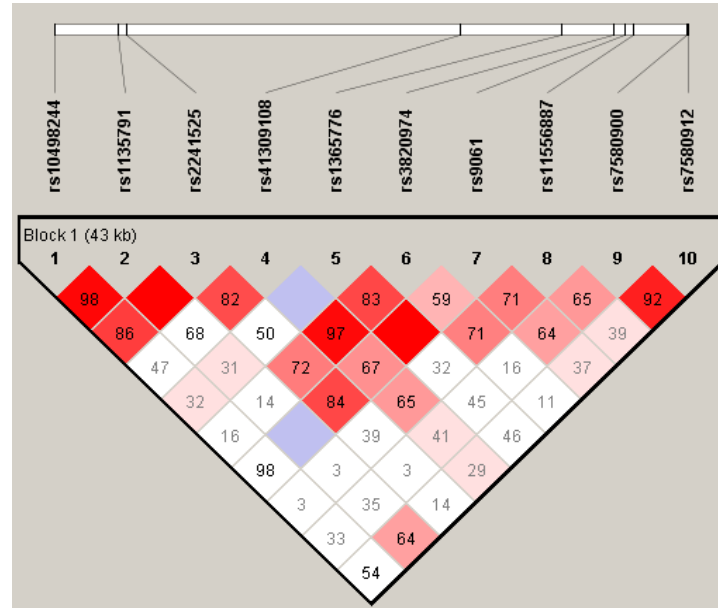

**b**

| Haplotypes | Frequencies |        | Chi Square | OR (95%CI)       | P value       |
|------------|-------------|--------|------------|------------------|---------------|
|            | LTBI        | Health |            |                  |               |
| ATGTACGCAA | 0.231,      | 0.281  | 1.3        | 0.77 (0.49-1.21) | 0.2542        |
| ATATACGCAA | 0.049,      | 0.090  | 2.256      | 0.52 (0.22-1.23) | 0.1331        |
| ATGTACGCGG | 0.099       | 0.068  | 1.441      | 1.50 (0.77-2.94) | 0.23          |
| ATATACGCGG | 0.122       | 0.061  | 5.472      | 2.11 (1.11-3.99) | <b>0.0193</b> |
| GCGTACGCAA | 0.028       | 0.060  | 1.981      | 0.46 (0.15-1.39) | 0.1593        |
| ATGAAAATGG | 0.015       | 0.051  | 3.191      | 0.28 (0.06-1.25) | 0.074         |
| ATGAAAGCAA | 0.025       | 0.048  | 1.327      | 0.50 (0.15-1.64) | 0.2493        |
| ATGAAAACGG | 0.024       | 0.045  | 1.141      | 0.53 (0.16-1.76) | 0.2854        |
| ATGTGAGCAA | 0.008       | 0.042  | 3.488      | 0.18 (0.02-1.36) | 0.0618        |
| ATGTACGCGA | 0.063       | 0.024  | 5.206      | 2.76 (1.12-6.84) | <b>0.0225</b> |
| ATGAAAGCGG | 0.041       | 0.021  | 1.73       | 2.00 (0.69-5.74) | 0.1884        |
| GCGTGAGCAA | 0.024       | 0.025  | 0.008      | 0.95 (0.27-3.37) | 0.9272        |
| ATGTACACGA | 0.007       | 0.020  | 0.933      | 0.35 (0.04-3.06) | 0.334         |
| ATGAAAATAA | 0.010       | 0.019  | 0.577      | 0.48 (0.07-3.24) | 0.4477        |
| ATGAAAATGA | 0.014       | 0.017  | 0.051      | 0.84 (0.17-4.19) | 0.8216        |
| GCGTACGCGA | 0.018       | 0.010  | 0.563      | 1.79 (0.38-8.44) | 0.4532        |
| ATGTACACGG | 0.008       | 0.011  | 0.092      | 0.69 (0.08-5.8)  | 0.7617        |

1 OR: odds ratio; CI: confidence interval; ORs are adjusted for gender. The significant ORs are shown in italic.

**Figure S1:** Association of *SP110* SNP haplotypes with LTBI risk in LTBI cases vs. healthy controls. **a** Haplotype block map for *SP110* with 10 SNPs. **b** Association of haplotype frequencies with LTBI risk in LTBI cases and healthy controls.

**a**

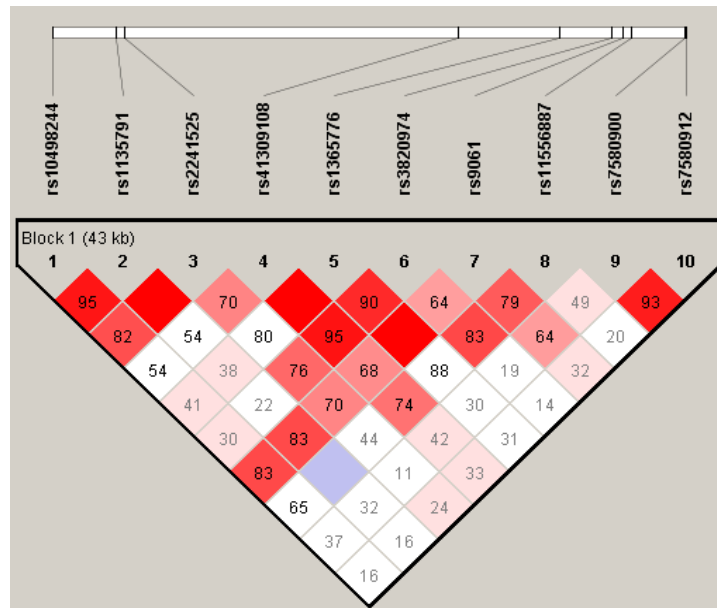

**b**

| Haplotypes | Frequencies |       | Chi Square | OR (95%CI)        | P value       |
|------------|-------------|-------|------------|-------------------|---------------|
|            | TB          | LTBI  |            |                   |               |
| ATGTACGCAA | 0.304,      | 0.235 | 2.427      | 1.42 (0.91-2.22)  | 0.1193        |
| ATATACGCAA | 0.076,      | 0.051 | 1.03       | 1.56 (0.66-3.64)  | 0.3103        |
| ATGTACGCGG | 0.062,      | 0.092 | 1.554      | 0.65 (0.33-1.28)  | 0.2125        |
| ATATACGCGG | 0.058,      | 0.093 | 2.178      | 0.60 (0.30-1.19)  | 0.14          |
| ATGAAAACGG | 0.055,      | 0.024 | 2.11       | 2.35 (0.72-7.64)  | 0.1463        |
| GCGTGAGCAA | 0.046,      | 0.024 | 1.27       | 1.98 (0.59-6.63)  | 0.2598        |
| GCGTACGCGG | 0.040,      | 0.034 | 0.123      | 1.20 (0.42-3.41)  | 0.7257        |
| ATGAAAGCGG | 0.030,      | 0.050 | 1.351      | 0.58 (0.23-1.46)  | 0.2451        |
| ATGTACGCGA | 0.024,      | 0.060 | 4.708      | 0.38 (0.16-0.95)  | <b>0.03</b>   |
| ATGAAAGCAA | 0.030,      | 0.023 | 0.204      | 1.33 (0.38-4.66)  | 0.6512        |
| GCGTACGCAA | 0.029,      | 0.016 | 0.67       | 1.81 (0.43-7.68)  | 0.413         |
| ATGTGAGCAA | 0.028,      | 0.008 | 1.844      | 3.71 (0.49-28.11) | 0.1745        |
| ATGTACACGA | 0.024,      | 0.008 | 1.403      | 3.17 (0.41-24.25) | 0.2362        |
| ATGAAAATAA | 0.023,      | 0.009 | 0.957      | 2.47 (0.38-16.13) | 0.328         |
| ATGAAAATGG | 0.022,      | 0.014 | 0.312      | 1.55 (0.32-7.47)  | 0.5766        |
| ATGTGAGCGG | 0.020,      | 0.015 | 0.157      | 1.38 (0.30-6.43)  | 0.6921        |
| ATGAAAATGA | 0.020,      | 0.014 | 0.21       | 1.44 (0.30-6.99)  | 0.6468        |
| ATGAAAGCGA | 0.007,      | 0.028 | 4.576      | 0.24 (0.06-0.99)  | <b>0.0324</b> |

1 OR: odds ratio; CI: confidence interval; ORs are adjusted for gender. The significant ORs are shown in italic.

**Figure S2:** Association of *SP110* SNP haplotypes with TB risk in TB cases vs. LTBI individuals. **a** Haplotype block map for *SP110* with 10 SNPs. **b** Association of haplotype frequencies with TB risk in TB cases vs. LTBI individuals.

**a**

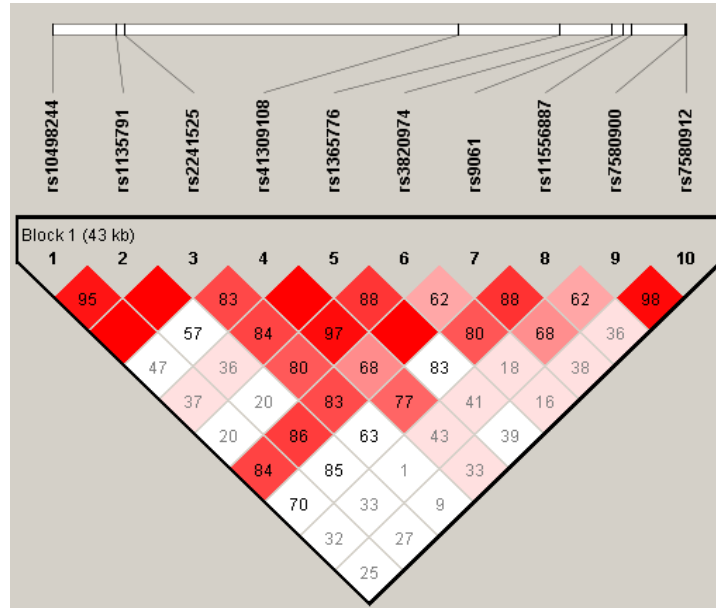

**b**

| Haplotypes | Frequencies |        | Chi Square | OR (95%CI)        | P value       |
|------------|-------------|--------|------------|-------------------|---------------|
|            | TB          | Health |            |                   |               |
| ATGTACGCAA | 0.287,      | 0.280  | 0.072      | 1.04 (0.80-1.34)  | 0.7885        |
| ATATACGCAA | 0.081,      | 0.094  | 0.588      | 0.85 (0.56-1.28)  | 0.4431        |
| ATGTACGCGG | 0.070,      | 0.059  | 0.576      | 1.20 (0.75-1.94)  | 0.4477        |
| ATATACGCGG | 0.061,      | 0.061  | 0          | 0.99 (0.61-1.63)  | 0.9937        |
| GCGTACGCAA | 0.047,      | 0.053  | 0.217      | 0.88 (0.52-1.51)  | 0.6412        |
| ATGAAAACGG | 0.051,      | 0.042  | 0.55       | 1.24 (0.71-2.16)  | 0.4581        |
| ATGTGAGCAA | 0.035,      | 0.045  | 0.742      | 0.77 (0.42-1.40)  | 0.389         |
| ATGAAAGCAA | 0.034,      | 0.045  | 0.889      | 0.75 (0.41-1.37)  | 0.3458        |
| ATGAAAATGG | 0.027,      | 0.047  | 2.988      | 0.58 (0.30-1.09)  | 0.0839        |
| GCGTGAGCAA | 0.041,      | 0.027  | 1.693      | 1.54 (0.80-2.98)  | 0.1932        |
| ATGAAAGCGG | 0.033,      | 0.025  | 0.706      | 1.35 (0.67-2.73)  | 0.4009        |
| ATGTACGCGA | 0.025,      | 0.027  | 0.026      | 0.94 (0.45-1.96)  | 0.8714        |
| ATGAAAATAA | 0.023,      | 0.025  | 0.061      | 0.91 (0.42-1.97)  | 0.8057        |
| ATGTACACGA | 0.024,      | 0.023  | 0.027      | 1.07 (0.49-2.30)  | 0.8702        |
| ATGAAAATGA | 0.023,      | 0.021  | 0.08       | 1.12 (0.51-2.49)  | 0.7774        |
| GCGTACGCGG | 0.024,      | 0.007  | 5.709      | 3.81 (1.18-12.31) | <b>0.0169</b> |
| ATGTGAGCGG | 0.019,      | 0.009  | 1.695      | 2.00 (0.69-5.81)  | 0.1929        |

1 OR: odds ratio; CI: confidence interval; ORs are adjusted for gender. The significant ORs are shown in italic.

**Figure S3:** Association of *SP110* SNP haplotypes with TB risk in TB cases vs. healthy controls. **a** Haplotype block map for *SP110* with 10 SNPs. **b** Association of haplotype frequencies with TB risk in TB cases and healthy controls.

**Table S1:** Primers for genotype analysis for *SP110*

| Gene         | SNP        | Primer    | Sequence                            | Size (bp) | Allele 1 mass | Allele 2 mass |
|--------------|------------|-----------|-------------------------------------|-----------|---------------|---------------|
| <i>SP110</i> | rs7580912  | Forward   | ACGTTGGATGGTCTCAAACCACA<br>AACCACC  | 99        | G, 5353.5     | A, 5433.4     |
|              |            | Reverse   | ACGTTGGATGCCCCACCTTCTGTG<br>ATAATG  |           |               |               |
|              |            | Extension | CTGGGCCTTCCAAACTC                   |           |               |               |
| <i>SP110</i> | rs7580900  | Forward   | ACGTTGGATGGTCTCAAACCACA<br>AACCACC  | 99        | G, 5769.8     | A, 5849.7     |
|              |            | Reverse   | ACGTTGGATGCCCCACCTTCTGTG<br>ATAATG  |           |               |               |
|              |            | Extension | TGTGATAATGAACATGCC                  |           |               |               |
| <i>SP110</i> | rs11556887 | Forward   | ACGTTGGATGATGAATGGCAGAG<br>CAGAGAC  | 100       | C, 6334.2     | T, 6414.1     |
|              |            | Reverse   | ACGTTGGATGTGGGGTATGGAGG<br>GAGCTT   |           |               |               |
|              |            | Extension | TGAAGCCCAACTGGCCTAG                 |           |               |               |
| <i>SP110</i> | rs9061     | Forward   | ACGTTGGATGCTCCTCAGTGACC<br>AATGAC   | 111       | A, 6076       | G, 6092       |
|              |            | Reverse   | ACGTTGGATGTGCACAGTGCTAG<br>TGAGGAG  |           |               |               |
|              |            | Extension | TACATCCAAAATGAATGCG                 |           |               |               |
| <i>SP110</i> | rs3820974  | Forward   | ACGTTGGATGTTTCTCCTCATTCT<br>GGTCCC  | 98        | C, 6872.5     | A, 6912.4     |
|              |            | Reverse   | ACGTTGGATGTTGTCACCTGGCCA<br>CTGAATG |           |               |               |
|              |            | Extension | ACTGAATGGAGGAAGAAAAG                |           |               |               |
| <i>SP110</i> | rs1365776  | Forward   | ACGTTGGATGAGATGTATCTGGTC<br>AACTCC  | 102       | G, 5911.9     | A, 5991.8     |
|              |            | Reverse   | ACGTTGGATGCAGCTCCTCTTGT<br>ACTCTC   |           |               |               |
|              |            | Extension | TGTACTCTCATCTTACCTC                 |           |               |               |
| <i>SP110</i> | rs41309108 | Forward   | ACGTTGGATGTCTGGGTCTCTGG<br>GAGATT   | 106       |               |               |
|              |            | Reverse   | ACGTTGGATGAGTGCCATCAATGA<br>TCTCTG  |           |               |               |

|              |            |           |                                    |     |           |           |
|--------------|------------|-----------|------------------------------------|-----|-----------|-----------|
|              |            | Extension | TAGTAAATGCCCTTGGGAAAC              |     | T, 7014.6 | A, 7070.5 |
|              |            | Forward   | ACGTTGGATGTCCTAGATGAAG<br>GACTCAC  |     |           |           |
| <i>SP110</i> | rs2241525  | Reverse   | ACGTTGGATGTAGCTAGCAGGGT<br>CCATTC  | 98  |           |           |
|              |            | Extension | TCCTGATCAATTACACACA                |     | G, 5962.9 | A, 6042.9 |
|              |            | Forward   | ACGTTGGATGGAAGGAAAAGGA<br>AGGAACGC |     |           |           |
| <i>SP110</i> | rs1135791  | Reverse   | ACGTTGGATGAATACCTTCAGCAG<br>CTCTCC | 103 |           |           |
|              |            | Extension | ACGGAATATACGTTGTGAAGGAA            |     | C, 7407.9 | T, 7487.8 |
|              |            | Forward   | ACGTTGGATGCAGACTCTCTGCTT<br>GTTGTG |     |           |           |
| <i>SP110</i> | rs10498244 | Reverse   | ACGTTGGATGCAGAGTGGATATCC<br>AAACCC | 117 |           |           |
|              |            | Extension | TGTGCCATTTGTCTTGC                  |     | A, 5429.6 | G, 5445.6 |

---
